# Supplementary material for: HIV Protease Inhibitor Use During Pregnancy Is Associated With Decreased Progesterone Levels, Suggesting a Potential Mechanism Contributing to Fetal Growth Restriction
Source: PubMed Central journal article supplement — J Infect Dis. 2014 Jul 16;211(1):10–8. doi: 10.1093/infdis/jiu393 (PMC4264589; doi:10.1093/infdis/jiu393), 2014-07-16
Supplement: supp_jiu393_jiu393supp2.pdf [file supp_jiu393_jiu393supp2.pdf]

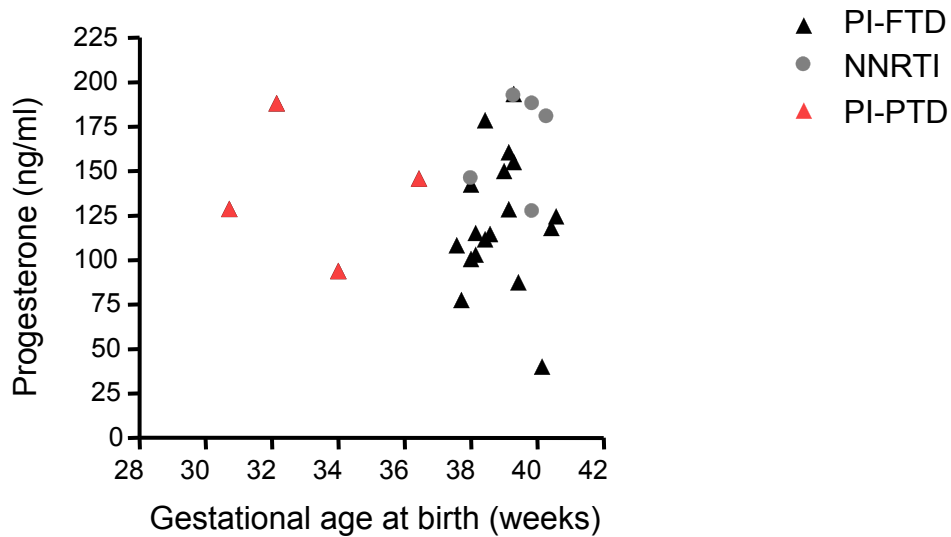

**Supplemental Figure 2.** Progesterone levels do not correlate with gestational age at delivery

Plasma progesterone levels assessed in samples collected between gestational week 25-28 from HIV+ women are plotted against gestational age at birth. Black triangles represent HIV+ women on PI-based therapy that delivered full-term (FTD), N=18. Red triangles represent HIV+ women on PI-based therapy that delivered pre-term (PTD), N=4. Gray dots represent HIV+ women on NNRTI-based therapy, N=5. None of these women delivered pre-term. There was no significant correlation between progesterone levels and gestational age at birth (assessed by Spearman t-test).
